# Supplementary material for: Trajectories of self-rated health in an older general population and their determinants: the Lifelines Cohort Study
Source: PubMed Central journal article supplement (PMC7045095; doi:10.1136/bmjopen-2019-035012), 2020-02-18
Supplement: bmjopen-2019-035012supp001.pdf [file bmjopen-2019-035012supp001.pdf]

## APPENDIX A: PHYSIOLOGICAL MARKER SPECIFICATION

**Table A1:** Cut-offs used to define normal and affected values for markers per organsystem.

| <b>Lung function</b>                            |                                                                                                                                                                                                                                                                                                    |
|-------------------------------------------------|----------------------------------------------------------------------------------------------------------------------------------------------------------------------------------------------------------------------------------------------------------------------------------------------------|
| FEV1 (L) /FVC (L) ratio<br>(multiplied by 100%) | Cut-off scores used (Quanjer et al., 2012):<br>Normal: $\geq 70\%$<br>Affected $< 70\%$                                                                                                                                                                                                            |
| <b>Renal function</b>                           |                                                                                                                                                                                                                                                                                                    |
| eGFR<br>(in ml/min/1.73m <sup>2</sup> )         | Estimated with the Cockcroft Gault formula using serum creatine in umol/l (adjusted for age, sex, weight) (Cockcroft & Gault, 1976).<br>Cut-off scores used (Traynor, Mactier, Geddes, & Fox, 2006):<br>Normal: $\geq 90$ ml/min/1.73m <sup>2</sup><br>Affected: $< 90$ ml/min/1.73m <sup>2</sup>  |
| <b>Endocrine function<sup>1</sup></b>           |                                                                                                                                                                                                                                                                                                    |
| TSH (mIU/L)                                     | Normscores (lab standards UMCG):<br>Low: $< 0.5$ mIU/L<br>Normal: $0.5 - 4.0$ mIU/L<br>High: $\geq 4.0$ mIU/L                                                                                                                                                                                      |
| fT4 (pmol/L)                                    | Normscores (Boesten et al., 2012):<br>Low: $< 11.0$ pmol/L<br>Normal: $11.0 - 19.5$ pmol/L<br>High: $> 19.5$ pmol/L                                                                                                                                                                                |
| <b>Immune function</b>                          |                                                                                                                                                                                                                                                                                                    |
| Hb (mmol/L)                                     | Different cut-offs used for men and women (lab standards UMCG).<br>Cut off used:<br>Men: Normal: $\geq 8.5$ and $\leq 11$ mmol/L<br>Affected: $< 8.5, > 11$ mmol/L<br>Women: Normal: $\geq 7.5$ and $\leq 10$ mmol/L<br>Affected: $< 7.5, > 10$ mmol/L                                             |
| <b>Liver function</b>                           |                                                                                                                                                                                                                                                                                                    |
| Hepatic Steatosis Index                         | Cut off used (Lee et al., 2010; Meems et al., 2015):<br>Normal: $\leq 36$<br>Affected $> 36$                                                                                                                                                                                                       |
| <b>Cognitive function</b>                       |                                                                                                                                                                                                                                                                                                    |
| MMSE                                            | Adjusted for level of education: primary education or less (max.6 years) and secondary or higher ( $> 6$ years) (Schmand, Lindeboom, Hooijer, & Jonker, 1995).<br>Cut-off used:<br>$\leq$ Primary: Normal: $\geq 25$<br>Affected: $< 25$<br>$\geq$ Secondary: Normal $\geq 27$<br>Affected: $< 27$ |
| <b>Body composition</b>                         |                                                                                                                                                                                                                                                                                                    |
| BMI (for Caucasian)                             | Age adjusted BMI cutoffs were used (Winter, Macinnis, Wattanapenpaiboon, & Nowson, 2014).<br>Cut offs used:<br>Normal: $\geq 23.0$ BMI $< 30$<br>Affected: $< 23$ & BMI $\geq 30$                                                                                                                  |
| <b>Cardiovascular function<sup>2</sup></b>      |                                                                                                                                                                                                                                                                                                    |

|                                                |                                                                                                                                                                                     |                                                    |
|------------------------------------------------|-------------------------------------------------------------------------------------------------------------------------------------------------------------------------------------|----------------------------------------------------|
| SBP (mmHg)                                     | Adjusted for age ((European Society of Hypertension/ European Society of Cardiology, 2014))<br>Cut-offs used:<br>Aged <80<br>Normal: ≤ 140 mmHg<br>High: >140 mmHg                  | Aged ≥80:<br>Normal: ≤ 160 mmHg<br>High: >160 mmHg |
| DBP (mmHg)                                     | Cut-off used (European Society of Hypertension/ European Society of Cardiology, 2014):<br>Normal: <90 mmHg<br>High: ≥90 mmHg                                                        |                                                    |
| Total cholesterol (mmol/L)/ HDL (mmol/L) ratio | Cut offs used (European Society of Cardiology / European Atherosclerosis Society, 2016; Landelijke werkgroep Cardiovasculair risicomanagement, 2012):<br>Normal: <5.0<br>High ≥ 5.0 |                                                    |

### Glucose metabolism

|                                 |                                                                                                                             |
|---------------------------------|-----------------------------------------------------------------------------------------------------------------------------|
| HbA1c (mmol (HbA1c) / mol (Hb)) | Cut offs used (Fried et al., 2009):<br>Normal: < 48 mmol/mol (corresponding to 6,5% of total Hb)<br>Affected: ≥ 48 mmol/mol |
|---------------------------------|-----------------------------------------------------------------------------------------------------------------------------|

Abbreviations: FER, forced expiratory ratio; eGFR, estimated glomerular filtration rate; TSH, thyroid stimulating hormone; FSH, follicle-stimulating hormone; HB, hemoglobin; MMSE, mini mental state examination; BMI, body mass index; SBP, systolic blood pressure; DBP, diastolic blood pressure; HDL, high density lipoprotein; HbA1C, glycated hemoglobin.

1. TSH cut-offs were interpreted with fT4; both TSH and fT4 should be in the normal range to score 'normal' concerning the endocrine system.
2. Blood pressure was interpreted with cholesterol levels; both diastolic and systolic blood pressure and cholesterol/HDL ratio or should be in the normal range to score 'normal' concerning the cardiovascular system.

### References:

- Boesten, L. S. M., Brugts, M. P., & van Rossum, A. P. (2012). Schildklierdiagnostiek : discrepantie FT4 en TSH. *Nederlands Tijdschrift Voor Geneeskunde*, *156*, A4167V.
- Cockcroft, D. W., & Gault, H. (1976). Prediction of Creatinine Clearance from Serum Creatinine. *Nephron*, *16*(1), 31–41. European Society of Cardiology / European Atherosclerosis Society. (2016). 2016 ESC/EAS guidelines for the management of dyslipidemias. *European Heart Journal*, *37*, 2999–3058.
- European Society of Hypertension/ European Society of Cardiology. (2014). 2014 guidelines for the management of arterial hypertension. *Primary Care Cardiovascular Journal*, *7*(2), 85–88.
- Fried, L. P., Xue, Q. L., Cappola, A. R., Ferrucci, L., Chaves, P., Varadhan, R., ... Bandeen-Roche, K. (2009). Nonlinear multisystem physiological dysregulation associated with frailty in older women: Implications for etiology and treatment. *Journals of Gerontology - Series A Biological Sciences and Medical Sciences*, *64*(10), 1049–1057.
- Landelijke werkgroep Cardiovasculair risicomanagement. (2012). Dutch standard of cardiovascular riskmanagement. *Huisarts Wet*, *55*(1), 14–28.
- Lee, J., Kim, D., Jung, H., Lee, C., In, J., Kim, W., ... Lee, H. (2010). Hepatic steatosis index : A simple screening tool reflecting nonalcoholic fatty liver disease. *Digestive and Liver Disease*,

42(7), 504–509.

- Meems, L. M. G., De Borst, M. H., Postma, D. S., Vonk, J. M., Kremer, H. P. H., Schuttelaar, M. L. A., ... De Boer, R. A. (2015). Low levels of Vitamin D are associated with multimorbidity: Results from the LifeLines Cohort Study. *Annals of Medicine*, 47(6), 474–481.
- Quanjer, P. H., Stanojevic, S., Cole, T. J., Baur, X., Hall, G. L., Culver, B. H., ... Schindler, C. (2012). Multi-ethnic reference values for spirometry for the 3-95-yr age range: The global lung function 2012 equations. *European Respiratory Journal*, 40(6), 1324–1343.
- Schmand, B., Lindeboom, J., Hooijer, C., & Jonker, C. (1995). Relation between education and dementia : the role of test bias revisited. *Journal of Neurology, Neurosurgery and Psychiatry*, 59, 170–174.
- Traynor, J., Mactier, R., Geddes, C. C., & Fox, J. G. (2006). How to measure renal function in clinical practice: Estimated glomerular filtration rate in general practice. *Bmj*, 333(7574), 918.2.
- Winter, J. E., Macinnis, R. J., Wattanapenpaiboon, N., & Nowson, C. A. (2014). BMI and all-cause mortality in older adults: a meta-analysis. *Am J Clin Nutr*, 99, 875–890.

## APPENDIX B: FLOWCHART OF STUDY SAMPLE

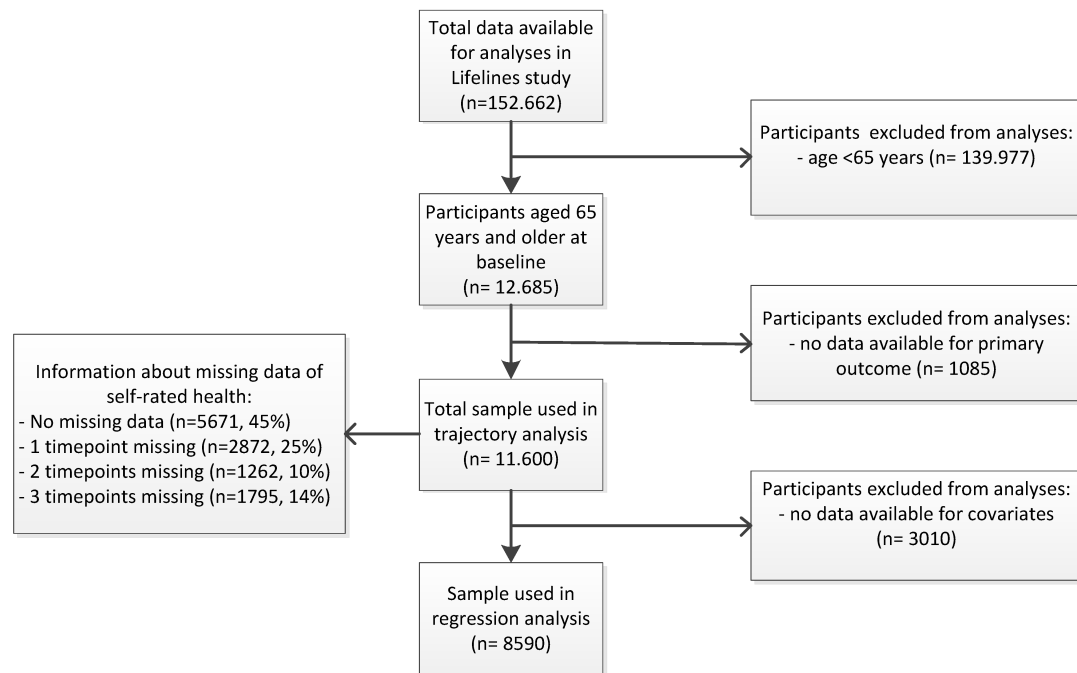

**Figure B1.** Flow of selection of study sample.

## APPENDIX C: BASIC MODEL SPECIFICATIONS

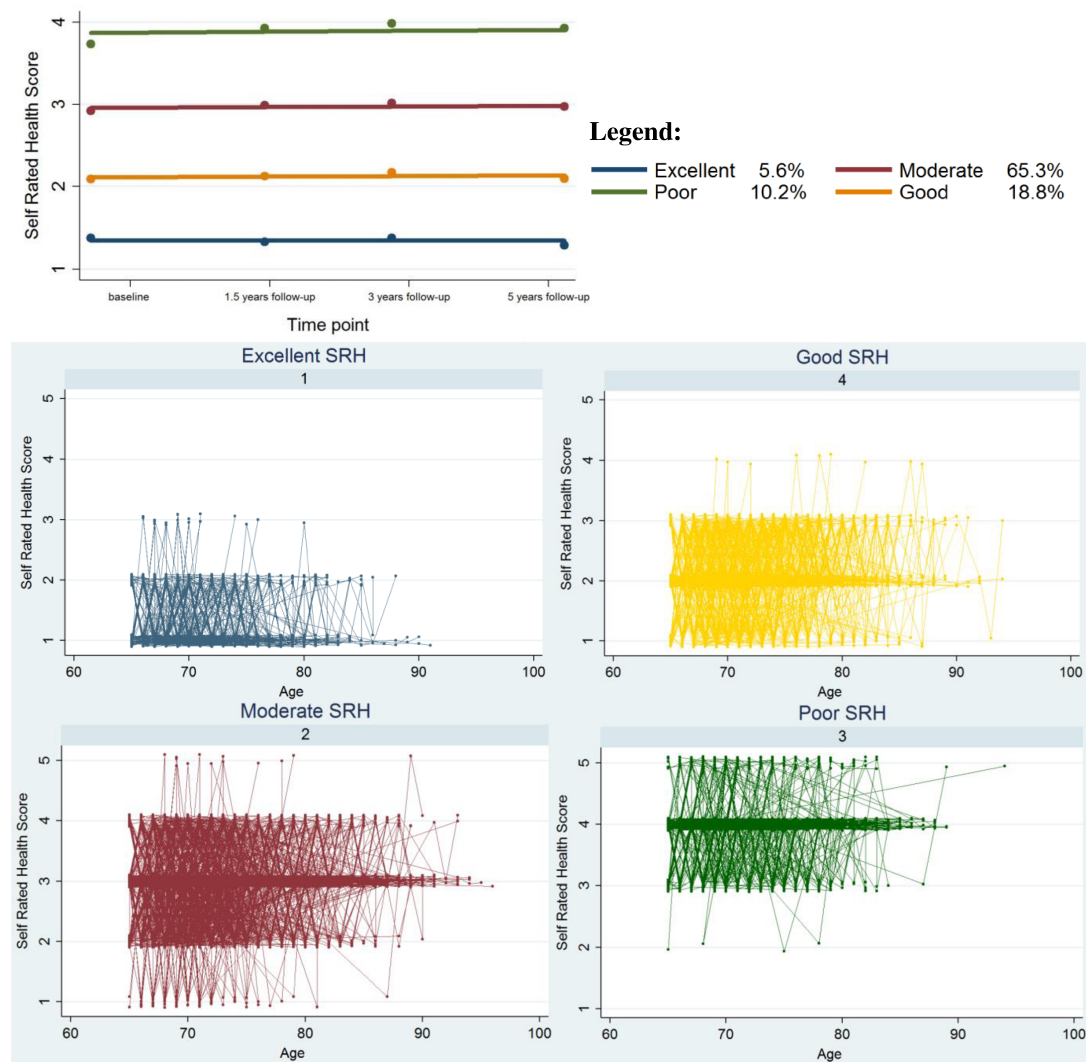

**Figure C1:** Basic mean trajectory groups of SRH (a), and observed individual trajectories per trajectory group (b-e) over five years of 11,600 people aged 65 years and older of the Lifelines Cohort. a. Dots represent the mean observed value per measurement moment; solid lines represent fit lines; dotted lines represent 95% confidence intervals of the fit lines. b-e. Jittering was used for adding random noise to make all individual scores integer to avoid overlap of individual trajectories for people with identical trajectories.

**Table C1:** Bayesian Information Criteria and probability estimation Jeffreys's scale of evidence for Bayes factors of crude trajectory calculations with fixed quadratic growth terms used to select adequate number of groups.

| No. of groups | BIC<br>(n=11.600) | Probability<br>correct model |
|---------------|-------------------|------------------------------|
| 2             | -35016.79         | 0                            |
| 3             | -33001.46         | 0                            |
| 4             | -32240.77         | 0.98                         |
| 5             | -32259.49         | < 0.01                       |
| 6             | -32278.20         | < 0.01                       |
| 7             | -32244.54         | 0.02                         |

**Table C2:** Posterior diagnostics of model performance of basic trajectory model.

| Group | Model<br>estimate<br>( $\pi^{\wedge}$ ) | 95% CI       | Proportion<br>classified<br>( $p^{\wedge}$ ) | Ave. PP | Odds correct<br>classification |
|-------|-----------------------------------------|--------------|----------------------------------------------|---------|--------------------------------|
| 1     | .056                                    | (.050; .062) | .052                                         | .892    | 138.3                          |
| 2     | .653                                    | (.642; .664) | .662                                         | .941    | 8.4                            |
| 3     | .102                                    | (.095; .109) | .104                                         | .852    | 50.7                           |
| 4     | .188                                    | (.179; .198) | .182                                         | .863    | 27.1                           |

APPENDIX D: SENSITIVITY ANALYSES

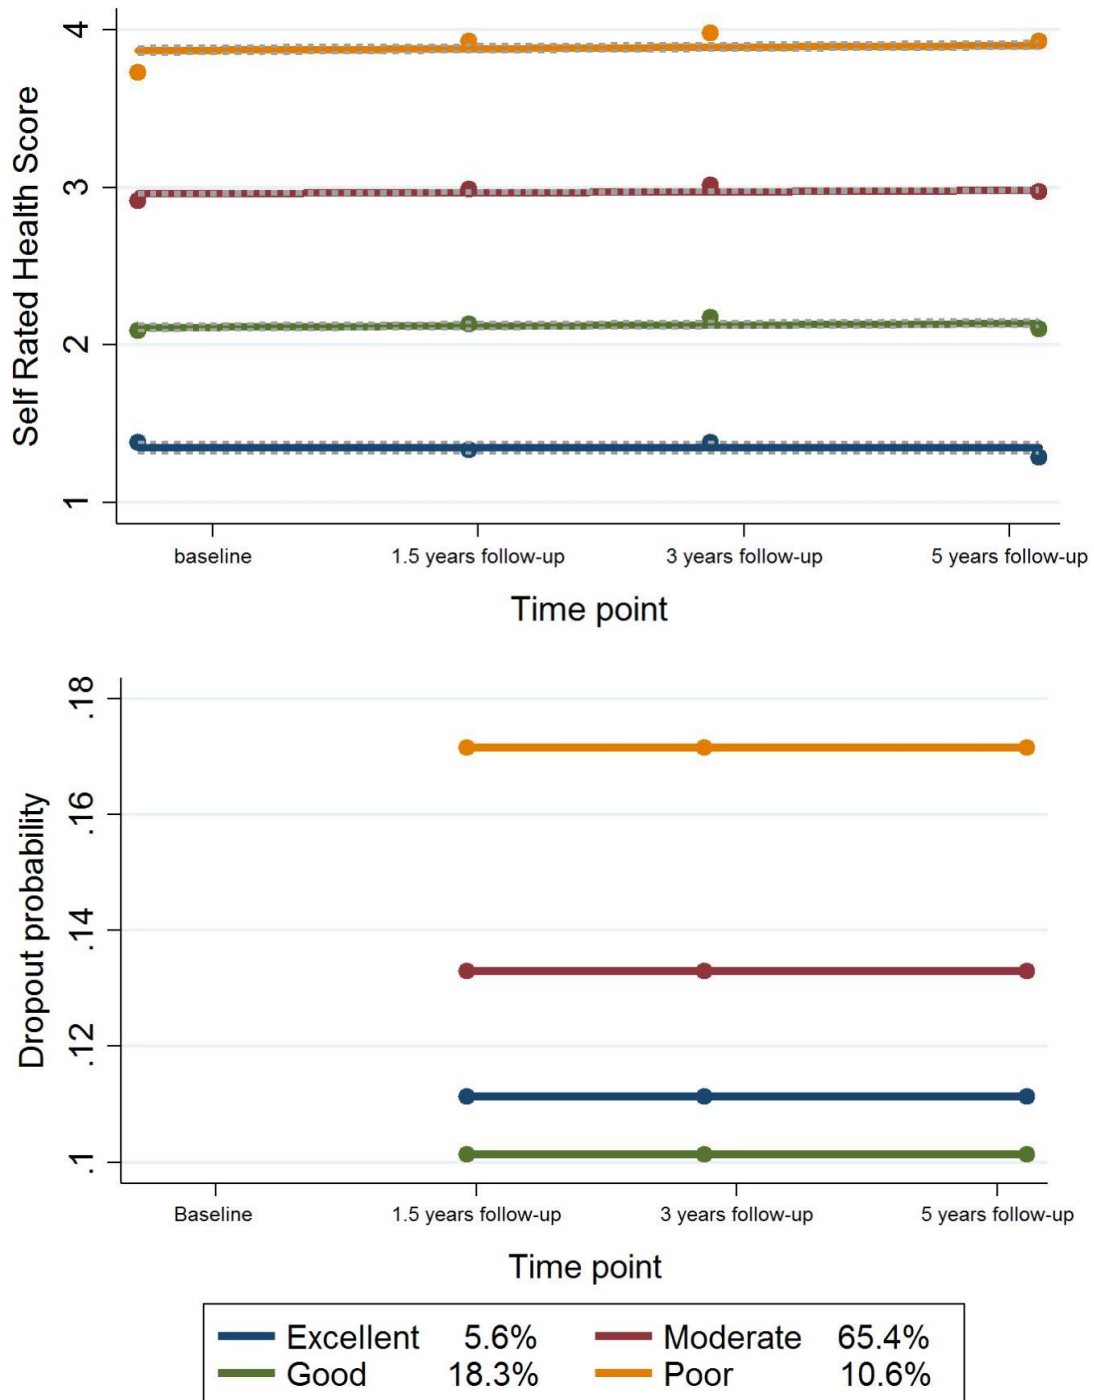

**Figure D1:** Trajectories of SRH jointly modelled with attrition. The upper plot represent trajectories of SRH accounted for attrition risk with probability for dropout per trajectory is presented in the lower plot. Dots represent the mean observed value per measurement moment; solid lines represent fit lines; dotted lines in the upper plot represent 95% confidence intervals of the fit lines.

**Table D1.** Comparison of posterior probability of assignment for the basic model, the model including covariates / risk factors, and the trajectory model that jointly modelled attrition (sensitivity analysis).

| <b>Group Allocation</b>                                                                 | <b>N (%)</b> | <b>Excellent</b> | <b>Good</b> | <b>Moderate</b> | <b>Poor</b> |
|-----------------------------------------------------------------------------------------|--------------|------------------|-------------|-----------------|-------------|
| <b>Basic model (step 1): posterior probability of assignment</b>                        |              |                  |             |                 |             |
| Excellent                                                                               | 607 (5.6)    | <b>0.89</b>      | <0.01       | 0.01            | 0.05        |
| Good                                                                                    | 2111 (18.8)  | 0.11             | <b>0.86</b> | 0.06            | <0.01       |
| Moderate                                                                                | 8762 (65.3)  | <0.01            | 0.15        | <b>0.91</b>     | 0.08        |
| Poor                                                                                    | 1205 (10.2)  | <0.01            | <0.01       | 0.03            | <b>0.85</b> |
| <b>Model with covariates (step 3): posterior probability of assignment</b>              |              |                  |             |                 |             |
| Excellent                                                                               | 471 (5.5)    | <b>0.91</b>      | 0.05        | <0.01           | <0.01       |
| Good                                                                                    | 1716 (20.0)  | 0.09             | <b>0.87</b> | 0.04            | <0.01       |
| Moderate                                                                                | 5637 (65.6)  | <0.01            | 0.08        | <b>0.95</b>     | 0.09        |
| Poor                                                                                    | 766 (8.9)    | <0.01            | <0.01       | 0.02            | <b>0.91</b> |
| <b>Model with attrition (sensitivity analysis): posterior probability of assignment</b> |              |                  |             |                 |             |
| Excellent                                                                               | 609 (5.7)    | <b>0.90</b>      | 0.05        | 0.01            | <0.01       |
| Good                                                                                    | 2123 (18.7)  | 0.10             | <b>0.86</b> | 0.05            | <0.01       |
| Moderate                                                                                | 8762 (65.3)  | <0.01            | 0.09        | <b>0.91</b>     | 0.14        |
| Poor                                                                                    | 1191 (10.3)  | <0.01            | <0.01       | 0.04            | <b>0.86</b> |

\*Rows may add to more than 1.0 due to rounding.
